# Supplementary material for: Radiation Exposure from GEP NET Surveillance
Source: MDPI journal article supplement (doi:10.3390/cancers16020427), 2024-01-19
Supplement: s1 [file s1]

Supplementary Table S1: Imaging recommendations by different consensus guidelines for completely resected stage I to III small bowel NETs

| Guideline | Cross sectional imaging |                                                                   | Nuclear medicine imaging recommendation            | Follow-up duration |
|-----------|-------------------------|-------------------------------------------------------------------|----------------------------------------------------|--------------------|
|           | Modality                | Frequency                                                         |                                                    |                    |
| NANETS    | CT or MRI               | Baseline at 6 months then annually                                | At baseline, then not recommended routinely        | 10 years           |
| ENETS     | CT or MRI               | Every 6 to 12 months                                              | SRS q 24 months                                    | Not specified      |
| NCCN      | CT or MRI               | Baseline at 3 to 12 months then every 12 to 24 months             | No recommendation                                  | 10 years           |
| ESMO      | CT or MRI               | Every 3 to 6 months                                               | SRS after 12 to 36 months; frequency not specified | Lifelong           |
| CommNETs  | CT or MRI               | Every 12 months for first three years, then every 12 to 24 months | No recommendation                                  | 10 years           |

NANETS: North American Neuroendocrine Tumor Society (2017)

ENETS: European Neuroendocrine Tumor Society (2017)

NCCN: National Comprehensive Cancer Network (2021)

ESMO: European Society for Medical Oncology (2020)

CommNETs: Commonwealth Neuroendocrine Tumor research collaborative (2018)

Supplementary Table S2. Cumulative radiation exposure associated with imaging protocols derived from different consensus guidelines.

| <b>Guideline</b> | <b>Imaging protocol permutations</b> | <b>CT mean dose (mSv)*</b> | <b>Number of CT scans</b> | <b>Number of 68Ga-DOTATATE PET scans **</b> | <b>Total effective dose (mSv)</b> |
|------------------|--------------------------------------|----------------------------|---------------------------|---------------------------------------------|-----------------------------------|
| NANETS           | CT only                              | 16.9                       | 11                        | 0                                           | 185.9                             |
|                  | Alternating CT and MRI               | 16.9                       | 5.5                       | 0                                           | 92.95                             |
|                  | MRI only                             | N/A                        | 0                         | 0                                           | 0                                 |
| ENETS            | CT only                              | 16.9                       | 12                        | 5                                           | 272.05                            |
|                  | Alternating CT and MRI               | 16.9                       | 6                         | 5                                           | 170.65                            |
|                  | MRI only                             | N/A                        | 0                         | 5                                           | 69.25                             |
| NCCN             | CT only                              | 16.9                       | 7                         | 0                                           | 118.3                             |
|                  | Alternating CT and MRI               | 16.9                       | 3.5                       | 0                                           | 59.15                             |
|                  | MRI only                             | N/A                        | 0                         | 0                                           | 0                                 |
| ESMO             | CT only                              | 16.9                       | 20                        | 2                                           | 365.7                             |
|                  | Alternating CT and MRI               | 16.9                       | 10                        | 2                                           | 196.7                             |
|                  | MRI only                             | N/A                        | 0                         | 2                                           | 27.7                              |
| COMMNET          | CT only                              | 16.9                       | 7                         | 0                                           | 118.3                             |
|                  | Alternating CT and MRI               | 16.9                       | 3.5                       | 0                                           | 59.15                             |
|                  | MRI only                             | N/A                        | 0                         | 0                                           | 0                                 |

NANETS: North American Neuroendocrine Tumor Society (2017)

ENETS: European Neuroendocrine Tumor Society (2017)

NCCN: National Comprehensive Cancer Network (2021)

ESMO: European Society for Medical Oncology (2020)

COMMNET: Commonwealth Neuroendocrine Tumor Research Collaboration (2018)

\*CT mean dose (mSv) as calculated from our study

\*\*68Ga-DOTATATE PET scan mean dose calculated from our study was 13.85mSv (includes CT component of scan)
